# Supplementary material
Source: Springer Nature journal article supplement (https://www.springermedizin.de/resource/supplementary/40164_2013_65_MOESM4_ESM.pdf/9687108)

# Ingram *et al.*, Additional File 4: Medulloblastoma Gene Expression Heat Maps for ABC Transporter Family Members

Toronto Cohort

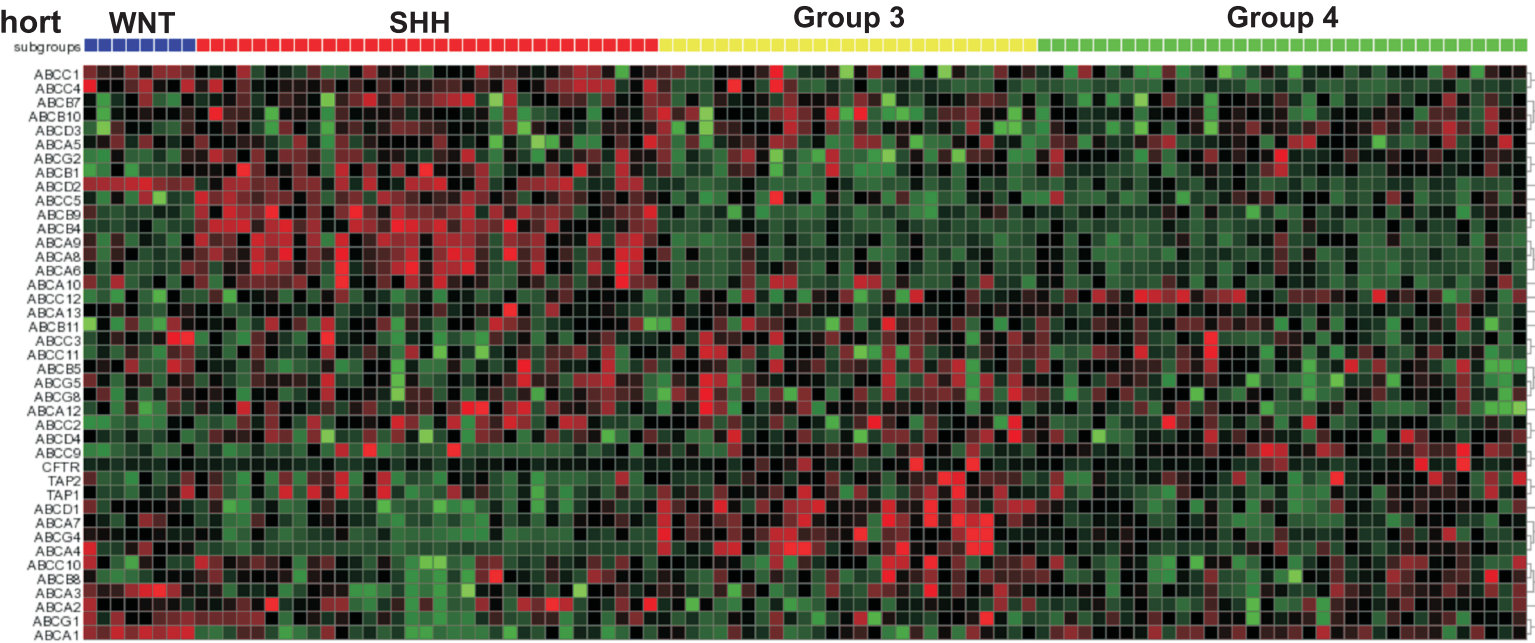

Boston Cohort

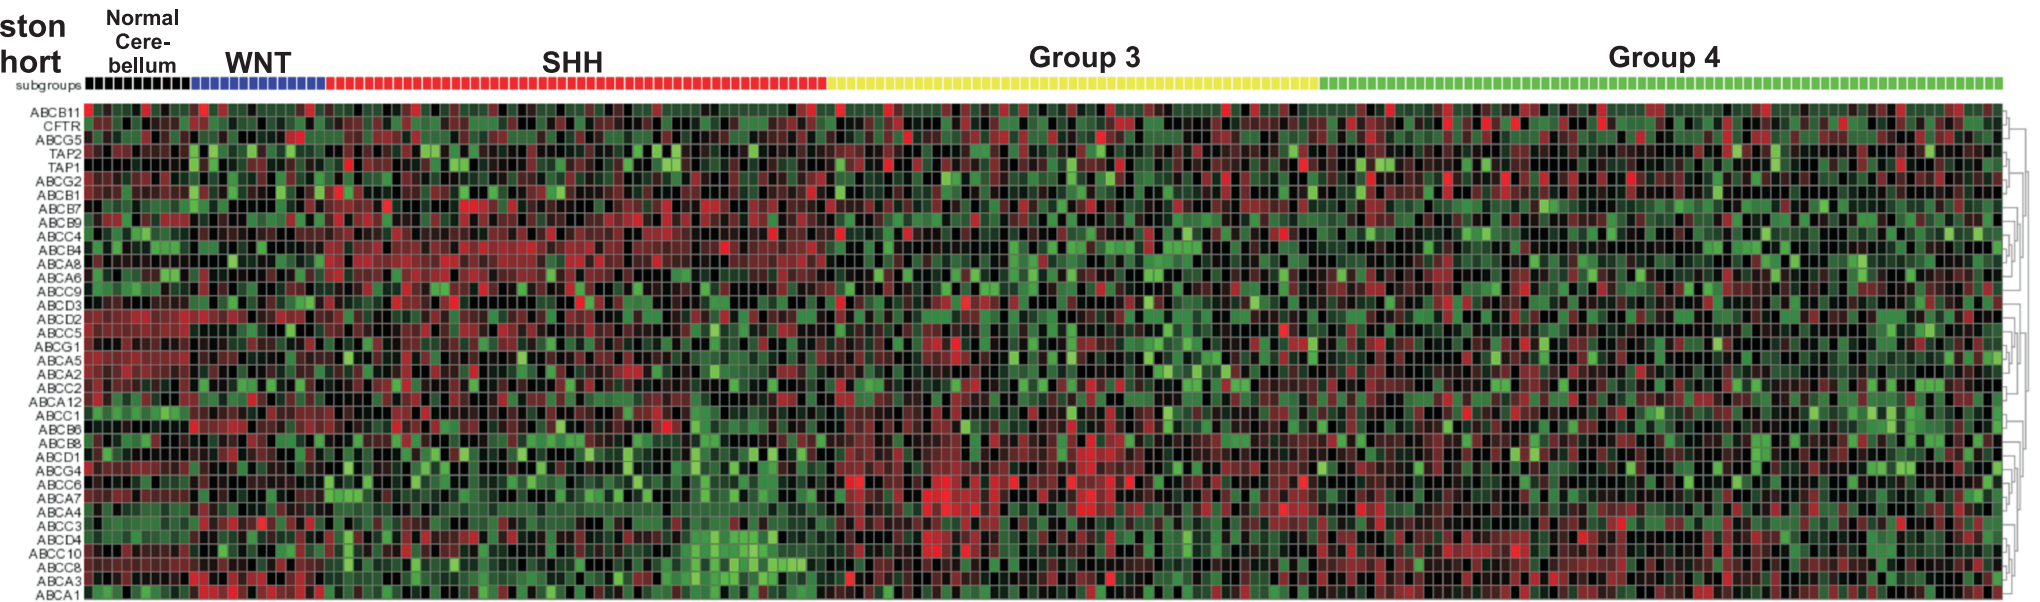

Supplement: MOESM4 [file 9687108]
